# Supplementary material for: FGF14 Functions as a Tumor Suppressor through Inhibiting PI3K/AKT/mTOR Pathway in Colorectal Cancer
Source: PubMed Central journal article supplement (PMC6959027; doi:10.7150/jca.36316), 2020-01-01
Supplement: jcav11p0819s1.pdf [file jcav11p0819s1.pdf]

**Fig. S1.** Methylation-specific PCR (MSP) was performed to determine promoter methylation status of FGF14. M means the methylated DNA; U means the unmethylated DNA (left panel). Treatment with methyltransferase inhibitor 5-Aza-20-deoxycytidine (5-Aza) restored the mRNA expression of FGF14 (right panel). GAPDH was used as loading control.

**Fig. S2. FGF14 influenced little on the growth of MEF cells.** (A) The silence effect of small interference RNA on FGF14 in MEF cells was detected by Western blot. (B) Silencing FGF14 showed little impact on the proliferation of MEF cells. (C) Silencing FGF14 had little influence on the colony formation ability of MEF cells.

**Fig. S3. No correlation was observed between the ectopic expression of FGF14 and cell migration or cell invasion of CRC.** (A) Migration ability of CRC cells was not affected by the ectopic expression of FGF14, as shown by migration assay in DLD1 and HCT116 cells. (B) Invasion ability of CRC cells was not affected by the ectopic expression of FGF14, as shown by invasion assay in DLD1 and HCT116 cells.

Fig. S1

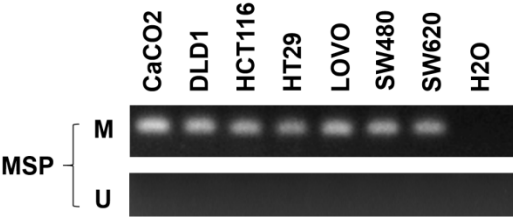

Fig. S2

A

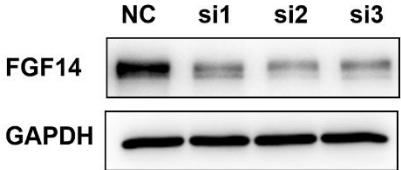

B

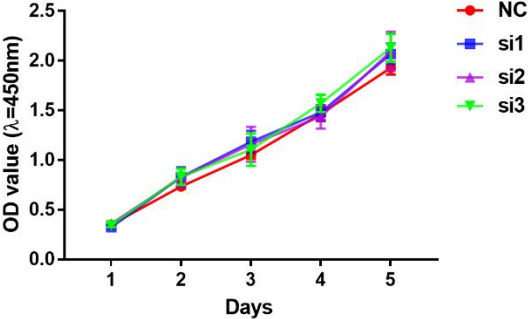

C

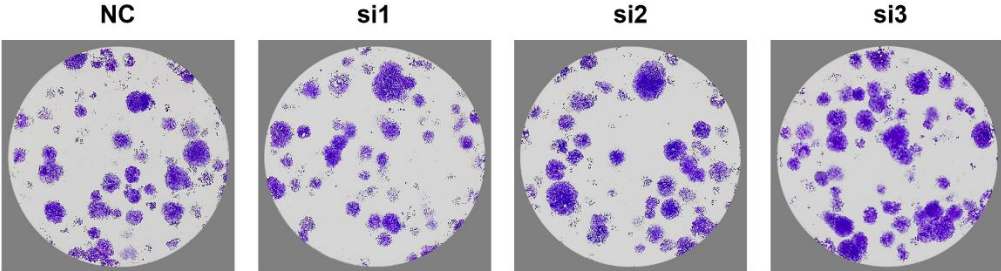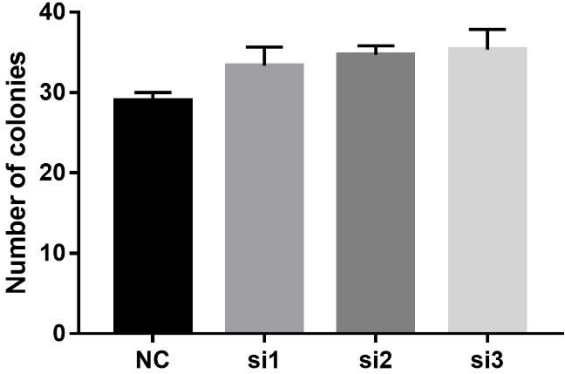

Fig. S3

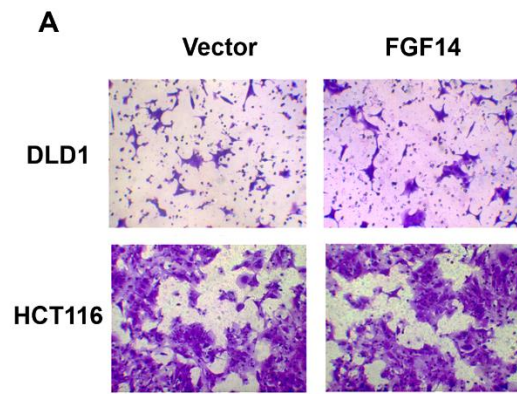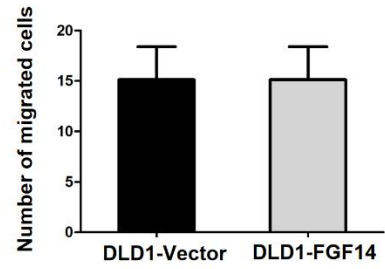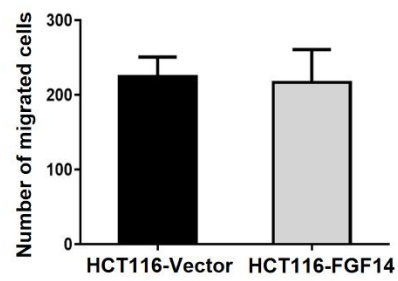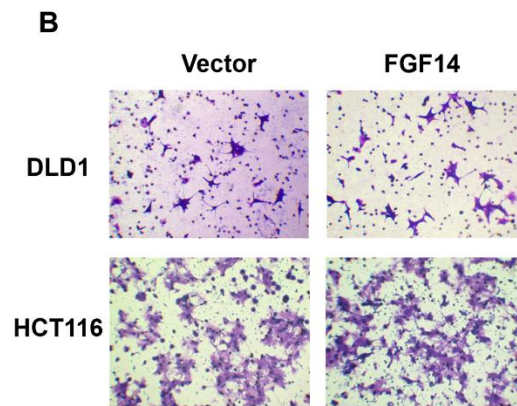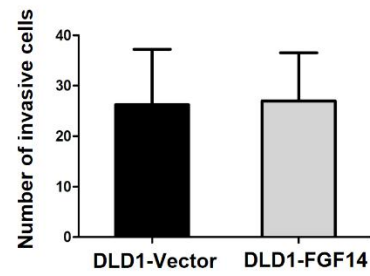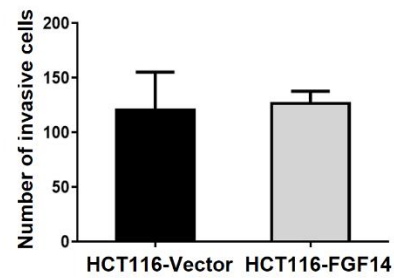

**Supplementary Table 1. Primers Used**

|             |                           |
|-------------|---------------------------|
| FGF14-F     | GGCAACCTGGTGGATATCTT      |
| FGF14-R     | CCTTGCCTGCAATATAACCT      |
| GAPDH-F     | CAGCCTCAAGATCATCAGCA      |
| GAPDH-R     | TGTGGTCATGAGTCCTTCCA      |
| FGF14-MSP-F | GTATCGGTAATTACGTTAAGATCGA |
| FGF14-MSP-R | ATAAAATTAACAAAACATCGAAACG |
| FGF14-USP-F | GTATTGGTAATTATGTTAAGATTGA |
| FGF14-USP-R | AAAATTAACAAAACATCAAAACACT |

**Supplementary Table 2. Antibodies Used**

| Antibody          | Code     | Source information        |
|-------------------|----------|---------------------------|
| FGF14             | ab229610 | Abcam                     |
| GAPDH             | #8884    | Cell Signaling Technology |
| mTOR              | #2972    | Cell Signaling Technology |
| p-mTOR            | #2971    | Cell Signaling Technology |
| Akt               | #9272    | Cell Signaling Technology |
| p-Akt             | #4060    | Cell Signaling Technology |
| PI3K              | #4255    | Cell Signaling Technology |
| p-PI3K            | #4249    | Cell Signaling Technology |
| Bax               | #5023    | Cell Signaling Technology |
| Bcl-2             | #4223    | Cell Signaling Technology |
| cleaved PARP      | #5625    | Cell Signaling Technology |
| cleaved Caspase-3 | #9664    | Cell Signaling Technology |
| cleaved Caspase-7 | #9497    | Cell Signaling Technology |
